# Supplementary material
Source: PubMed Central journal article supplement (PMC5373465)
Supplement: ASN.2016091018SupplementaryData.pdf [file ASN.2016091018SupplementaryData.pdf]

**Supplemental Table 1.** Summary of study characteristics.

| Study                             | Population                                                                                                                                                                                                                                                                                                | Technique                                                                                         | Significant Findings                                                                                |
|-----------------------------------|-----------------------------------------------------------------------------------------------------------------------------------------------------------------------------------------------------------------------------------------------------------------------------------------------------------|---------------------------------------------------------------------------------------------------|-----------------------------------------------------------------------------------------------------|
| Mischak et al., 2004 <sup>1</sup> | <u>Case:</u> 112 T2D adults with varying UAE<br>46 normal (< 20 mg/L)<br>45 low grade (> 20 mg/L)<br>21 high grade (> 100 mg/L)<br><u>Control:</u> 39 healthy non-smoker adults<br><u>All:</u> had baseline SCr concentrations of < 1.3 mg/dl; no heart failure, cancer, and chronic inflammatory disease | CE-MS/MS; >800 Da cut-off with ≥ 2 charge states; MosaiquesVisu and Mascot software               | <i>Associated with renal as indicated by increased UAE</i><br>- ↑ ALB<br>- ↓ INSL3, UMOD            |
| Meier et al., 2005 <sup>2</sup>   | <u>Case:</u> 44 T1D adolescents<br><u>Control:</u> 9 healthy age-matched volunteers                                                                                                                                                                                                                       | CE-MS; >800 Da cut-off with ≥2 charge states; MosaiquesVisu software                              | Identified a urinary protein pattern for early nephropathy that was different from that of controls |
| Jain et al., 2005 <sup>3</sup>    | <u>Case:</u> 100 T2D adults with microalbuminuria<br><u>Control:</u> 20 healthy adults<br>18 with diabetes and normoalbuminuria<br>1 without diabetes and with microalbuminuria<br>1 without microalbuminuria and diabetes                                                                                | 2DE and MALDI-MS/MS; 5-mL cut-off; 'Ettan MALDI Software' with 'proteo Metrics LLC' search engine | <i>T2D with microalbuminuria v. controls</i><br>- ↑ AMBP, AZGP1, ORM                                |
| Sharma et al., 2005 <sup>4</sup>  | <u>Case:</u> 3 adults with macroalbuminuria and impaired renal function<br>2 T1D and 1 T2D<br><u>Control:</u> 5 healthy adults                                                                                                                                                                            | Fluorescence-based DIGE and SELDI-MS/MS; Profound search engine and Mascot software               | <i>Diabetic nephropathy v. controls</i><br>- ↑ SERPINA1<br>Validated SERPINA1 via ELISA             |
| Dihazi et al., 2007 <sup>5</sup>  | <u>Case:</u> 117 adults with varying disease<br>38 with T2D nephropathy<br>45 with uncomplicated T2D<br>34 with non-diabetic nephropathy<br><u>Control:</u> 45 healthy adults                                                                                                                             | GE and SELDI-MS/MS; >1kDa cut-off; MSDB and SwissProt dabatases; ProteinChip array                | <i>Diabetic nephropathy v. controls</i><br>- ↑ B2M<br>- ↓ UBA52                                     |

| Study                              | Population                                                                                                                                                                                                                               | Technique                                                                                                            | Significant Findings                                                                                                                                                                                                                                 |
|------------------------------------|------------------------------------------------------------------------------------------------------------------------------------------------------------------------------------------------------------------------------------------|----------------------------------------------------------------------------------------------------------------------|------------------------------------------------------------------------------------------------------------------------------------------------------------------------------------------------------------------------------------------------------|
| Otu et al., 2007 <sup>6</sup>      | <u>Case</u> : 31 T2D adults with nephropathy<br><u>Control</u> : 31 T2D adults with normoalbuminuria; matched for diabetes duration, age, sex, and BMI<br><u>All</u> : had baseline SCr concentrations of $\leq 1.2$ mg/dl; Pima Indians | SELDI-MS; 2-40 kDa range with $\geq 2$ signal-to-noise ratio Ciphergen Biomarker Wizard software                     | Identified a urinary protein pattern for T2D nephropathy cases that was different from that of controls<br>Survivor bias due to case-control design; unknown stability of urine samples stored for 10 years                                          |
| Rao et al., 2007 <sup>7</sup>      | <u>Case</u> : 33 T2D adults with varying UAE<br>10 with normoalbuminuria<br>13 with microalbuminuria<br>10 with macroalbuminuria<br><u>Control</u> : 9 healthy adults                                                                    | DIGE-MS/MS; immunodepletion of abundant serum proteins; Protein-Lynx Global Server software using SwissProt database | <i>T1D with macroalbuminuria v. normoalbuminuria</i><br>- $\uparrow$ A1BG, AHSG, AZGP1, GC, HPX, LRG1, SERPINA1, S100A9<br>- $\downarrow$ AMBP, APOA1, RBP, TTR                                                                                      |
| Bellei et al., 2008 <sup>8</sup>   | <u>Case</u> : 24 T2D adults with varying UAE<br>10 with normoalbuminuria<br>13 with micro- or macroalbuminuria<br><u>Control</u> : 12 healthy adults                                                                                     | 2DE and LC-MS/MS; Mascot software using SwissProt Database                                                           | <i>T2D nephropathy v. T2D and controls</i><br>- $\uparrow$ APOH, B2M, CAH, IGKC, RBP, TTR<br>- $\downarrow$ PPAP, RNA3, KLK3                                                                                                                         |
| Rossing et al., 2008 <sup>9</sup>  | <u>Case</u> : 89 T1D adults with varying UAE<br>30 with normoalbuminuria<br>29 with microalbuminuria<br>30 with macroalbuminuria<br><u>Control</u> : 30 healthy adults                                                                   | CE-MS and LC-MALDI-MS/MS; $<30$ kDa cut-off; MosaiquesVisu software                                                  | <i>T1D with normoalbuminuria v. controls</i><br>- $\downarrow$ COL1A1, UMOD<br><i>T1D with macroalbuminuria v. microalbuminuria</i><br>- $\uparrow$ ALB, AHSG, B2M, SERPINA1, TTR<br>- $\downarrow$ COL (1A1, 1A2, 3A1), FGB, PGRMC1, PSORS1C2, UMOD |
| Lapolla et al., 2009 <sup>10</sup> | <u>Case</u> : 30 adults with varying diseases<br>10 T2D without nephropathy<br>10 T2D with nephropathy<br>10 non-diabetic nephropathy<br><u>Control</u> : 10 healthy adults                                                              | LC-MS/MS; $<30$ kDa cut-off; ProteinPilot v2.1 using Uniprot Database                                                | <i>T2D nephropathy v. T2D and controls</i><br>- $\downarrow$ COL1A1, UMOD                                                                                                                                                                            |

| Study                                     | Population                                                                                                                                                                                                                                                                                      | Technique                                                                                         | Significant Findings                                                                                                                                                                                                                    |
|-------------------------------------------|-------------------------------------------------------------------------------------------------------------------------------------------------------------------------------------------------------------------------------------------------------------------------------------------------|---------------------------------------------------------------------------------------------------|-----------------------------------------------------------------------------------------------------------------------------------------------------------------------------------------------------------------------------------------|
| Jiang et al., 2009 <sup>11</sup>          | <u>Case</u> : 162 T2D adults with varying UAE<br>54 with normoalbuminuria<br>54 with microalbuminuria<br>54 with macroalbuminuria or nephropathy<br><u>Control</u> : 82 healthy adults; matched for age and sex<br><u>All</u> : Of Chinese Han descent                                          | Fluorescence-based DIGE and MALDI-MS/MS; Mascot software using Swiss-Prot/TrEMBL protein database | <i>T1D with micro- or macroalbuminuria v. controls</i><br>- ↑ ORM<br>Validated ORM via immunoturbidimetry: increased urinary ORM levels was associated with worsening diabetic kidney disease                                           |
| Jiang et al., 2009 <sup>12</sup>          | <u>Case</u> : 12 adults with nephropathy<br>6 T1D and 6 T2D<br><u>Control</u> : 6 healthy adults; matched for age and sex<br><u>All</u> : Of Chinese Han descent                                                                                                                                | 2DE and MALDI-MS/MS; Mascot software using Swiss-Prot/TrEMBL protein database;                    | <i>Diabetic nephropathy v. controls</i><br>- ↑ ALB, AZGP1, ECAD, IGKC, KNG, PTGDS, ORM, RBP<br>- ↓ AMBP, HP, TTR, UMOD<br>Validated ECAD via ELISA: increased urinary ECAD levels was associated with worsening diabetic kidney disease |
| Merchant et al., 2009 <sup>13</sup>       | <u>Case</u> : 21 T1D progressors with declining renal function<br><u>Control</u> : 40 stable T1D non-progressors<br><u>All</u> : from the Joslin Study of the Natural History of Microalbuminuria in Type 1 Diabetes                                                                            | LC-MALDI-MS and MALDI-MS/MS; <10 kDa cut-off; Mascot Software using NCBI nr 20060712 database     | <i>Progressors v. non-progressors</i><br>- ↑ FAT2, IPPK, TJP3<br>- ↓ COL4A1, COL5A1, TNX                                                                                                                                                |
| Snell-Bergeon et al., 2009 <sup>14a</sup> | <u>Case</u> : 19 adults with coronary artery disease<br>12 with and 4 without T1D<br><u>Control</u> : 19 adults without coronary artery disease; matched for age, diabetes status and duration, and sex<br><u>All</u> : from the Coronary Artery Calcification in Type I Diabetes (CACTI) study | CE-MS; <20 kDa cut-off<br>MosaiquesVisu software                                                  | - Validated urinary protein patterns identified by and described in Rossing et al 2008 for T1D and T1D nephropathy                                                                                                                      |
| Thraill et al., 2009 <sup>15</sup>        | <u>Case</u> : 24 T1D adults with varying UAE<br>12 normoalbuminuria<br>12 microalbuminuria<br><u>Control</u> : 12 healthy adults                                                                                                                                                                | Fluorescence-based DIGE and LC-MS/MS; >3 kDa; Mascot and Scaffold software                        | <i>T1D with microalbuminuria v. other groups</i><br>- ↑ CLU, CUBN, GC, LRP2, RBP4, EGF, TF, ALB                                                                                                                                         |

| Study                                | Population                                                                                                                                                                                                                                                | Technique                                                                                                                        | Significant Findings                                                                                                                                                                                                                            |
|--------------------------------------|-----------------------------------------------------------------------------------------------------------------------------------------------------------------------------------------------------------------------------------------------------------|----------------------------------------------------------------------------------------------------------------------------------|-------------------------------------------------------------------------------------------------------------------------------------------------------------------------------------------------------------------------------------------------|
| Alkhalaf et al., 2010 <sup>16b</sup> | <u>Case:</u> 64 T2D adults with nephropathy and retinopathy<br><u>Control:</u> 82 T2D adults with normoalbuminuria<br><u>All:</u> from the Prevention of Diabetic Complications (PREDICTIONS) study; aged 35-75 years and had diabetes for $\geq 5$ years | CE-MS and CE-MS/MS; <20 kDa cut-off; Mascot software using the SwissProt database                                                | <i>Diabetic nephropathy v. controls</i><br>- $\uparrow$ AHSB, ALB, B2M, SERPINA1, TTR<br>- $\downarrow$ CD99, COL (1A1, 1A2, 3A1), UMOD                                                                                                         |
| Maahs et al., 2010 <sup>17a</sup>    | <u>Case:</u> 587 diabetic adults (299 T1D) 369 with and 218 without impaired renal function (ACR >30 mg/g or GFR >60 ml/min)<br><u>Control:</u> 315 healthy adults<br><u>All:</u> from 10 different hospital centers in the US, Europe and Australia      | CE-MS/MS; <20 kDa cut-off; Mascot and MDSB Protein database                                                                      | <i>T1D and T2D v. controls</i><br>- $\uparrow$ FG (A, B), SERPINA1,<br>- $\downarrow$ COL (1A1, 1A2, 2A1, 3A1, 8A2), PGRMC1<br><i>T2D v. T1D and controls</i><br>- $\downarrow$ COL (1A1, 1A2)<br><i>T1D v. controls</i><br>- $\downarrow$ UMOD |
| Riaz et al., 2010 <sup>18</sup>      | <u>Case:</u> 100 T2D patients<br><u>Control:</u> 43 healthy adults; matched for age and sex<br><u>All:</u> from a double-blind placebo-controlled randomized clinical trial in Lahore, Pakistan                                                           | SDS-PAGE and LC-MALDI-MS/MS; Mascot software using the SwissProt database; ELISA for candidate validation                        | <i>T2D v. controls</i><br>- $\uparrow$ ALB, AZGP1, ECAD, RBP4<br>- $\downarrow$ AMBP, HP, TTR<br>Verified all 7 candidates via ELISA                                                                                                            |
| Wu et al., 2011 <sup>19</sup>        | <u>Case:</u> 75 T2D adults with varying UAE<br>30 normoalbuminuria<br>25 microalbuminuria<br>20 macroalbuminuria<br><u>Control:</u> 20 healthy sex-matched adults                                                                                         | ProteinChip H50 array; SELDI-MS; < 80 kDa; support vector machine learning                                                       | Identified 4 ion fragments with differential excretion between T2D adults with microalbuminuria and normoalbuminuria                                                                                                                            |
| Jin et al., 2012 <sup>20</sup>       | <u>Case:</u> 43 T2D adults with diabetic retinopathy and persistent microalbuminuria<br><u>Control:</u> 43 T2D healthy adults; matched for age, sex, BMI, and diabetes duration                                                                           | LC-MS/MS; >3 kDa cut-off; ProteinPilot v.2.0.1 and the Paragon algorithm; iTRAQ for quantification; MRM for candidate validation | <i>T2D with microalbuminuria v. T2D controls</i><br>- $\uparrow$ CP, GC, HP, PSCA, ORM1, SERPINA1, TF<br>- $\downarrow$ FABP, HSPG2, MASP2<br>Verified HP, ORM, PSCA, SERPINA1, and TF via MRM                                                  |

| Study                                 | Population                                                                                                                                                                                                                                                 | Technique                                                                                           | Significant Findings                                                                                                                                                                     |
|---------------------------------------|------------------------------------------------------------------------------------------------------------------------------------------------------------------------------------------------------------------------------------------------------------|-----------------------------------------------------------------------------------------------------|------------------------------------------------------------------------------------------------------------------------------------------------------------------------------------------|
| Schatzler et al., 2012 <sup>21</sup>  | <u>Case</u> : 13 T1D progressors who developed micro- or macroalbuminuria<br><u>Control</u> : 11 T1D non-progressors; matched for diabetes duration and age<br><u>All</u> : from CACTI study                                                               | LC-MS/MS; unknown cut-off; Proteomarker and Mascot softwares                                        | <i>Progressors v. non-progressors</i><br>- ↑ ORM<br>- ↓ CLU, GRN, UMOD<br>Verified all 4 candidates via ELISA                                                                            |
| Soggiu et al., 2012 <sup>22</sup>     | <u>Case</u> : 20 T1D adults with varying UAE<br>16 normoalbuminuria<br>4 microalbuminuria<br><u>Control</u> : 10 healthy adults                                                                                                                            | MALDI-MS and LC-MS/MS; >10 kDa cut-off; Mascot software                                             | <i>T1D (particularly with microalbuminuria) v. controls</i><br>- ↑ A1BG, AMBP, AZGP1, RBP4<br>- ↓ APO (A1, E), CD59, HMWK, UMOD                                                          |
| Zürbig et al., 2012 <sup>23c</sup>    | <u>Case</u> : 15 diabetic progressors who developed macroalbuminuria<br>6 T1D and 9 T2D<br><u>Control</u> : 20 diabetic non-progressors who remained normoalbuminuric<br>10 T1D and 10 T2D                                                                 | CE-MS; <20 kDa cut-off; MosaiquesVisu software                                                      | <i>Progressors v. non-progressors</i><br>- ↑ ALB, SERPINA1<br>- ↓ COL1A1, CD99, CLU, PIGR, UMOD                                                                                          |
| Bhensdadia et al., 2013 <sup>24</sup> | <u>Case</u> : 4 T2D progressors (UAE increased by >60% by the end of follow-up) with worsening SCr<br><u>Control</u> : 4 T2D non-progressors with stable SCr; matched for baseline SCr and UAE<br><u>All</u> : from Veterans Affairs Diabetes Trial (VADT) | LC-MS/MS; Mascot software and Scaffold; selected reaction monitoring (SRM) and ELISA for validation | <i>Progressors v. non-progressors</i><br>- ↑ AGRN, AGT, HP, MASP2<br>- ↓ LAMP<br>Verified the 5 markers above, UMOD, and NGAL in 30 adults via SRM; validated HP via ELISA in 204 adults |
| Chu et al., 2013 <sup>25</sup>        | <u>Case</u> : 28 uncomplicated T2D adults<br><u>Control</u> : 29 healthy adults                                                                                                                                                                            | LC-MALDI-MS/MS; 10 kDa cut-off; Bioworks Browser                                                    | <i>T2D v. controls</i><br>- ↓ CLU, EPRS, HINT1                                                                                                                                           |
| Roscioni et al., 2013 <sup>26c</sup>  | <u>Case</u> : 44 T2D progressors with worsening UAE<br><u>Control</u> : 44 T2D non-progressors<br><u>All</u> : from the Prevention of Renal and Vascular End-stage Disease (PREVEND) study                                                                 | CE-MS/MS; <20 kDa cut-off; MosaiquesVisu software                                                   | <i>Progressors v. non-progressors</i><br>- ↑ AHSG<br>- ↓ COL1A1<br><i>Associated with UAE</i><br>- ↑ AHSG, ALB, SERPINA1<br>- ↓ COL1A1, UMOD                                             |

| Study                                  | Population                                                                                                                                                                                                                                                                                                       | Technique                                                                  | Significant Findings                                                                                                                                                                                                                                                                                                                                                                                                                                                                              |
|----------------------------------------|------------------------------------------------------------------------------------------------------------------------------------------------------------------------------------------------------------------------------------------------------------------------------------------------------------------|----------------------------------------------------------------------------|---------------------------------------------------------------------------------------------------------------------------------------------------------------------------------------------------------------------------------------------------------------------------------------------------------------------------------------------------------------------------------------------------------------------------------------------------------------------------------------------------|
| Siwy et al., 2014 <sup>27c</sup>       | <u>Case</u> : 87 T2D adults with nephropathy<br><u>Control</u> : 78 T2D adults with normoalbuminuria<br><u>All</u> : from the Proteomic Prediction and Renin Angiotensin Aldosterone System Inhibition Prevention of Early Diabetic Nephropathy In Type 2 diabetic adults with normoalbuminuria (PRIORITY) trial | CE-MS; <20 kDa cut-off; MosaiquesVisu software                             | <i>T2D nephropathy v. control</i><br>- ↑ A1BG, AHSB, ALB, APOA1, B2M, SERPIN (A1, C1), TTR<br>- ↓ CD99, COL (1A1, 1A2), FXYD2, FGA, PGRMC1, PIGR                                                                                                                                                                                                                                                                                                                                                  |
| Lewandowicz et al., 2015 <sup>28</sup> | <u>Case</u> : 72 T2D adults<br>33 without retinopathy or nephropathy<br>15 with diabetic retinopathy<br>24 with diabetic nephropathy (and retinopathy)<br><u>Control</u> : 27 healthy adults matched for age and sex                                                                                             | LC-MS/MS; unknown cut-off; iTRAQ quantitation; Mascot Software             | <i>T2D nephropathy v. control</i><br>- ↑ ALB, SERPINA1<br>- ↓ COL1A1, HSPG2<br><i>T2D v. control</i><br>- ↑ ALB, PTGDS, SPP1<br>- ↓ ACTB, APOA1, COL1A1, HSPG2                                                                                                                                                                                                                                                                                                                                    |
| Suh et al., 2015 <sup>29</sup>         | <u>Case</u> : 40 T1D children and adolescents<br><u>Control</u> : 41 healthy age-matched siblings                                                                                                                                                                                                                | SDS-PAGE and FASP; LC-MS/MS; > 30 kDa; Mascot Software and Protein Prophet | <i>T1D v. control</i><br>- ↑ ENPEP, NAGA, MAN2B1, CTSC, FUCA1, ASAH1, GNS, FUCA2, DPP7, CPQ, HEXB, CTSB, LRG1, CST2, RBP, APOM, GAS6, GP5, TIMP1, SLC3A2, SELL, CDH5, MCAM, MSLN, PI16, VCAM1, COLEC12, ALCAM, ACE2, ERP44, HK3, GSN<br>- ↓ LAMP, KNG1, ACY3, AMN, ERP MGAM, IGFLR1, MADCAM1, CPM, RNF149, TOLLIP, HRSP12, CTTN<br>Verified 6 proteins (FUCA2, NAGA, COLEC-12, CD166, TIMP1, and APOM) via Western Blot. (These proteins were subsequently used into our bioinformatic analyses.) |

| Study                            | Population                                                                                                                                                                   | Technique                                                                             | Significant Findings                                                                                                                                                                        |
|----------------------------------|------------------------------------------------------------------------------------------------------------------------------------------------------------------------------|---------------------------------------------------------------------------------------|---------------------------------------------------------------------------------------------------------------------------------------------------------------------------------------------|
| Zhang et al., 2015 <sup>30</sup> | <u>Case</u> : 49 T2D adults divided into groups based HbA1c levels [BM] and fasting plasma glucose levels [GM]<br><u>Control</u> : 29 healthy adults matched for age and sex | LC-MALDI-MS/MS;<br><10 kDa cut-off;<br>ClinProt software using the IPI human database | <i>T2D v. control</i><br>- ↑ FGA, F2<br><i>T2D in high BM group v. low BM group</i><br>- ↑ FGA, F2                                                                                          |
| Fu et al., 2016 <sup>31</sup>    | <u>Case</u> : 28 T2D adults with microalbuminuria<br><u>Control</u> : 30 T2D adults with normoalbuminuria                                                                    | LC-MALDI-MS/MS;<br><10 kDa cut-off;<br>ClinProt software using the IPI human database | <i>T2D with microalbuminuria v. T2D controls</i><br>- ↑ F2, FGA, VTN<br>- ↓ F2, FGA ITIH4, VTN<br>Peptides of F2, FGA, and VTN were increased and decreased<br>Verified via MALDI-TOF-MS/MS |

<sup>a</sup>Studies that also validated the diabetes7 model<sup>14</sup>

<sup>b</sup>Studies that also validated the Rossing peptidome<sup>9</sup>

<sup>c</sup>Studies that also validated the CKD273 classifier<sup>32</sup>

2DE, two-dimensional gel electrophoresis; CE, capillary electrophoresis; DIGE, difference gel electrophoresis; ELISA, enzyme-linked immunosorbent assay; GE, gel electrophoresis; LC, liquid chromatography; MALDI, Matrix-assisted laser desorption/ionization; MRM, multiple reaction monitoring; SRM, selected reaction monitoring; T1D, type 1 diabetes; T2D, type 2 diabetes; UAE, urinary albumin excretion.
